# Supplementary material for: The Effect of Disease and Injury on Faecal Cortisol Metabolites, as an Indicator of Stress in Wild Hospitalised Koalas, Endangered Australian Marsupials
Source: MDPI journal article supplement (doi:10.3390/vetsci10010065), 2023-01-16
Supplement: s1 [file s1]

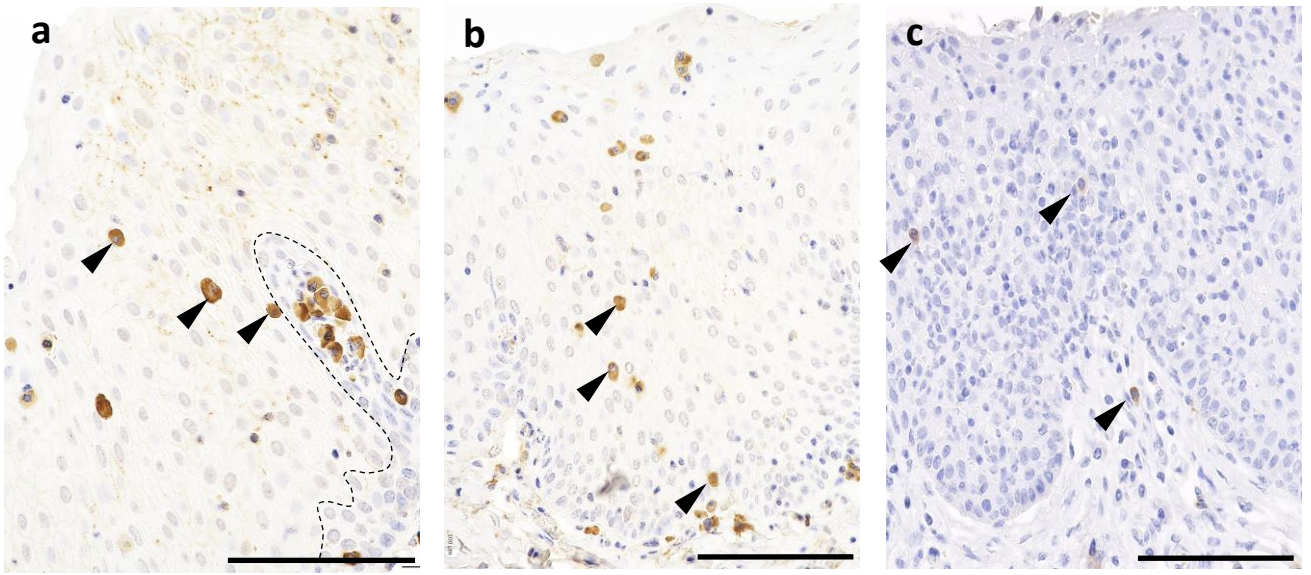

**Supplemental Figure S2. IgA<sup>+</sup> plasma cell localization in the epithelium of VV.** (A, B) Goat IgA plasma cells in the epithelium of VV. (C) Pig IgA plasma cells in the epithelium of VV proportion of exfoliative vaginal cells during the stages of the estrus cycle using vaginal smear techniques. Scale bars = 100 μm.
