# Supplementary material for: The Effect of Disease and Injury on Faecal Cortisol Metabolites, as an Indicator of Stress in Wild Hospitalised Koalas, Endangered Australian Marsupials
Source: MDPI journal article supplement (doi:10.3390/vetsci10010065), 2023-01-16
Supplement: s1 [file s1]

**Supplemental Table S2. List of antibody and conditions used for immunofluorescence**

| <b>Parameters</b>                                                         | <b>Antigen Retrieval</b> | <b>Blocking</b> | <b>Primary Antibody</b>                            | <b>Secondary Antibody</b>                   |
|---------------------------------------------------------------------------|--------------------------|-----------------|----------------------------------------------------|---------------------------------------------|
| IgA                                                                       | TB<br>115°C, 15<br>min   | 5% NDS          | Rabbit polyclonal<br>antibodies<br>(Bethyl) 1: 100 | Donkey anti-rabbit (SABPO kit,<br>Nichirei) |
| IgG                                                                       | CB<br>115°C, 15<br>min   | 5% NDS          | Rabbit polyclonal<br>antibodies<br>(Bethyl) 1: 100 | Donkey anti-rabbit (SABPO kit,<br>Nichirei) |
| CB: citrate buffer pH6, TB: tris buffer pH9, and NDS: normal donkey serum |                          |                 |                                                    |                                             |
