# Supplementary material for: The Effect of Disease and Injury on Faecal Cortisol Metabolites, as an Indicator of Stress in Wild Hospitalised Koalas, Endangered Australian Marsupials
Source: MDPI journal article supplement (doi:10.3390/vetsci10010065), 2023-01-16
Supplement: s1 [file s1]

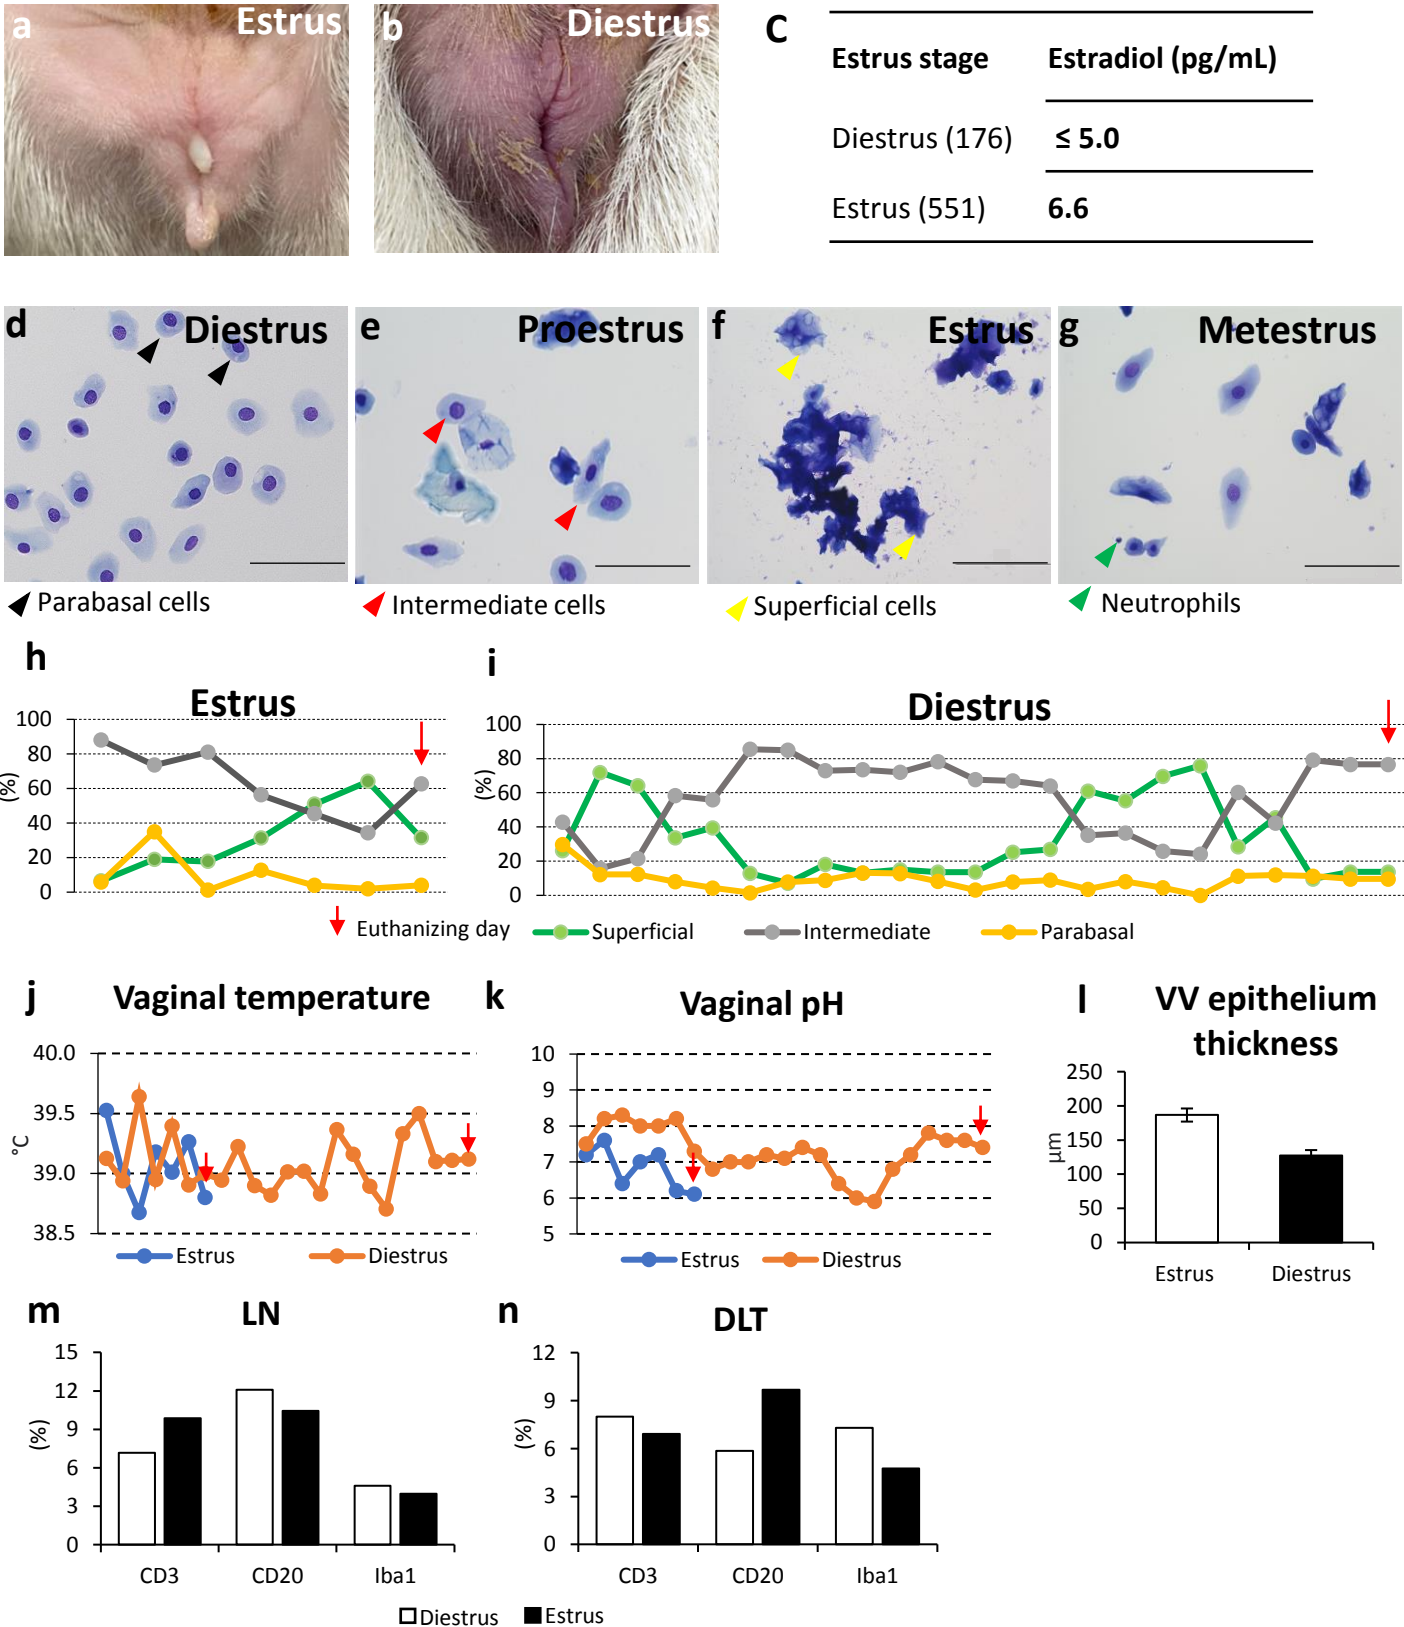

**Supplemental Figure S1. Immune cell composition in different stages of the estrus cycle**

(A) Vulvar condition during the estrus stage, showing the discharge of sticky cloudy mucous, swelling, and redness. (B) Vulva condition during the diestrus stage. (C) Estradiol level in the blood serum of goats in different stages of the estrus cycle. (D, E, F, G) Vaginal cytology in diestrus, proestrus, estrus, and metestrus stages. Scale bars = 50  $\mu$ m. (H, I) Daily percentage of exfoliative vaginal cells of goats expected as estrus (H) and diestrus (I) stages. (J) Daily vaginal temperature of goats. (K) Daily vaginal pH of goats. (L) Epithelium thickness of VV in goats expected as estrus and diestrus stages. Values = mean  $\pm$  SE.  $n = 1$ . (M) Percentage of immune cells occupying the LF during the estrus and diestrus stages.  $n = 1$  in each stage. (N) Percentage of immune cells occupying the DLT during the estrus and diestrus stages.  $n = 1$  in each stage. VV: vaginal vestibule, DLT: diffuse lymphoid tissue, LF: lymphatic follicle.
