# Supplementary material for: The Effect of Disease and Injury on Faecal Cortisol Metabolites, as an Indicator of Stress in Wild Hospitalised Koalas, Endangered Australian Marsupials
Source: MDPI journal article supplement (doi:10.3390/vetsci10010065), 2023-01-16
Supplement: s1 [file s1]

**Supplemental Table S1. List of antibody and conditions used for immunohistochemistry**

| Parameters                                                              | Antigen Retrieval   | Blocking   | Primary Antibody                                          | Secondary Antibody                                 |
|-------------------------------------------------------------------------|---------------------|------------|-----------------------------------------------------------|----------------------------------------------------|
| CD20                                                                    | TB<br>115°C, 15 min | 10%<br>NGS | Rabbit polyclonal antibodies<br>(Spring Bioscience) 1:300 | Goat anti-rabbit (SABPO kit, Nichirei)             |
| CD3                                                                     | CB<br>115°C, 15 min | 10%<br>NGS | Rabbit polyclonal antibodies (Nichirei) 1:200             | Goat anti-rabbit (SABPO kit, Nichirei)             |
| Iba1                                                                    | CB<br>115°C, 15 min | 10%<br>NGS | Rabbit polyclonal antibodies (Wako) 1: 1200               | Goat anti-rabbit (SABPO kit, Nichirei)             |
| PNAd                                                                    | CB<br>115°C, 15 min | 10%<br>NGS | Rat polyclonal antibodies (Biolegend) 1: 200              | Goat anti-rat IgG (Biolegend) 1:100 (Biotinylated) |
| IgA                                                                     | TB<br>115°C, 15 min | 10%<br>NGS | Rabbit polyclonal antibodies<br>(Bethyl) 1: 100           | Goat anti-rabbit (SABPO kit, Nichirei)             |
| IgG                                                                     | CB<br>115°C, 15 min | 10%<br>NGS | Rabbit polyclonal antibodies<br>(Bethyl) 1: 100           | Goat anti-rabbit (SABPO kit, Nichirei)             |
| Langerin                                                                | TB<br>115°C, 15 min | 10%<br>NGS | Rabbit polyclonal antibodies<br>(Proteintech) 1: 50       | Goat anti-rabbit (SABPO kit, Nichirei)             |
| CB: citrate buffer pH6, TB: tris buffer pH9, and NGS: normal goat serum |                     |            |                                                           |                                                    |
